# Supplementary material for: Engineered nanomicelles targeting proliferation and angiogenesis inhibit tumour progression by impairing the synthesis of ceramide-1-phosphate
Source: Royal Society of Chemistry journal article supplement (doi:10.1039/d3nr04806c), 2024-01-01
Supplement: d3nr04806c1.pdf [file d3nr04806c1.pdf]

## Supporting Information

### Engineered Nanomicelles Targeting the Proliferation and Angiogenesis Inhibit the Tumour Progression by Impairing the Synthesis of Ceramide-1-Phosphate

Poonam Yadav,<sup>1</sup> Kajal Rana,<sup>1</sup> Ruchira Chakraborty,<sup>1</sup> Ali Khan,<sup>2</sup> Devashish Mehta,<sup>2</sup> Dolly Jain,<sup>1</sup> Bharti Aggarwal,<sup>1</sup> Somesh K Jha,<sup>1</sup> Ujjaini Dasgupta,<sup>2</sup> Avinash Bajaj<sup>1,\*</sup>

1. Laboratory of Nanotechnology and Chemical Biology, Regional Centre for Biotechnology, 3<sup>rd</sup> Milestone Faridabad-Gurgaon Expressway, NCR Biotech Science Cluster, Faridabad-121001, Haryana, India.

2. Amity Institute of Integrative Sciences and Health, Amity University Haryana, Manesar, Gurgaon-122413, Haryana, India.

**Corresponding Author:**

Email: [bajaj@rcb.res.in](mailto:bajaj@rcb.res.in)

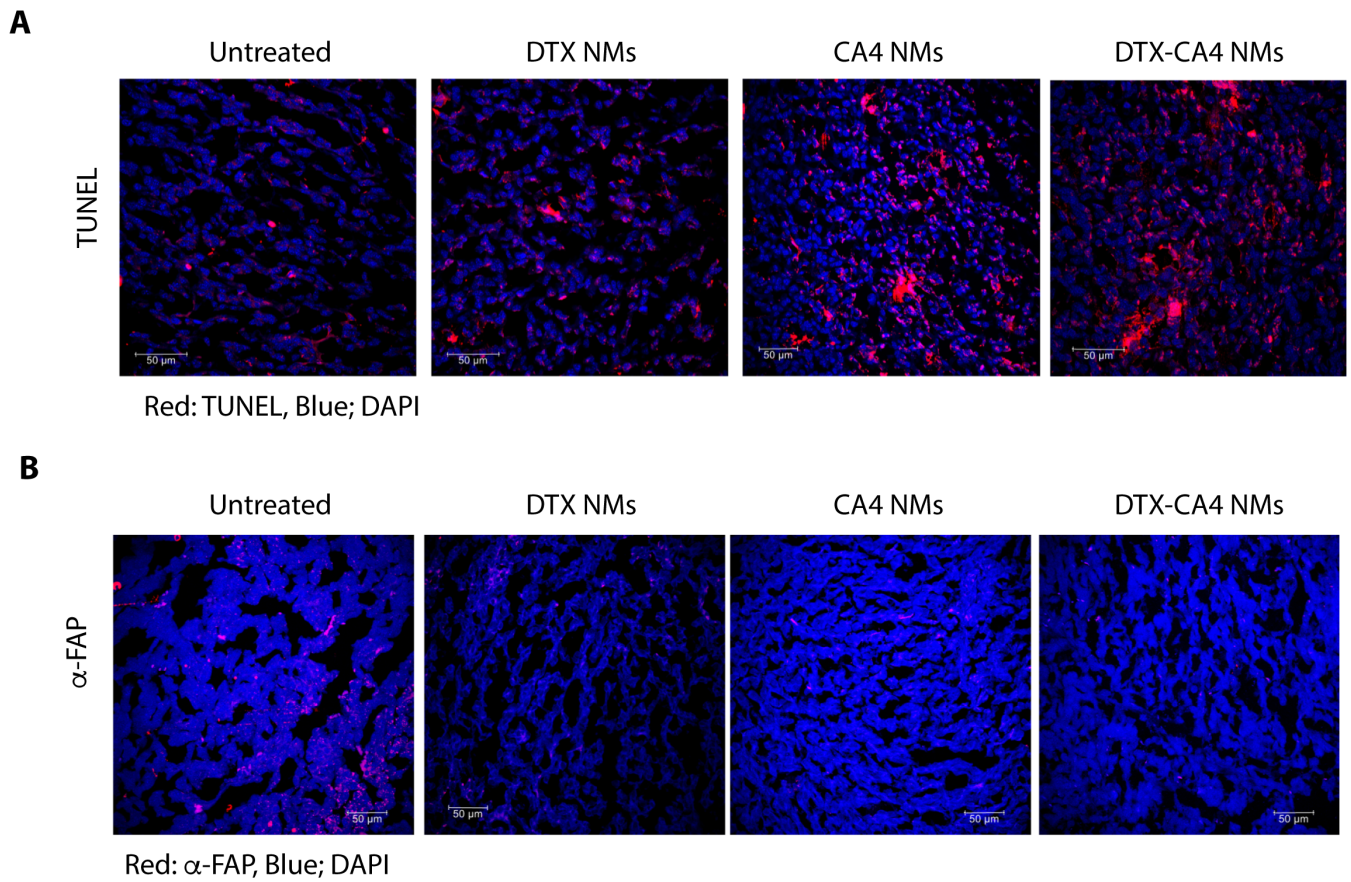

**Figure S1.** (A) Expression of Apoptotic cells in DTX-CA4 NMs treated tissues as compared to DTX NMs, CA4 NMs treated and untreated tumor tissues. (B) Immunofluorescence images showing the change in the expression of  $\alpha$ -FAP staining the cancer-associated fibroblast in DTX-CA4 NMs treated tissues in compared to DTX NMs, CA4 NMs treated and untreated tumor tissues.

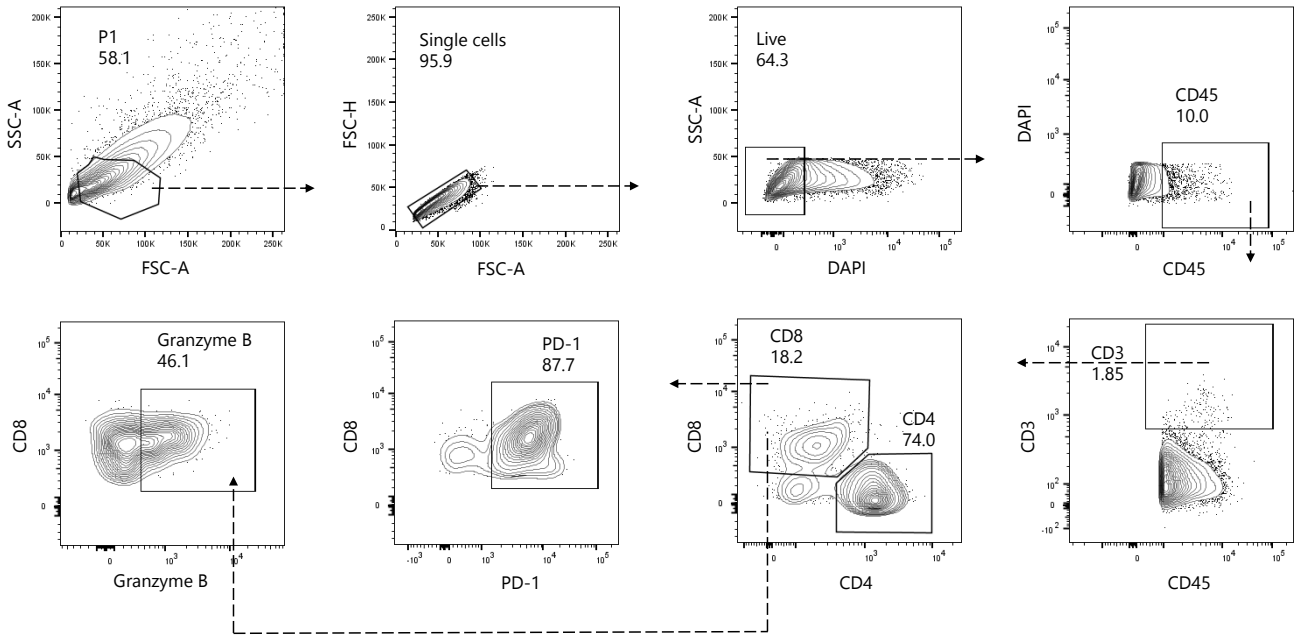

Figure S2. Gating strategy for quantification of Granzyme B<sup>+</sup> CD8<sup>+</sup> T cells.

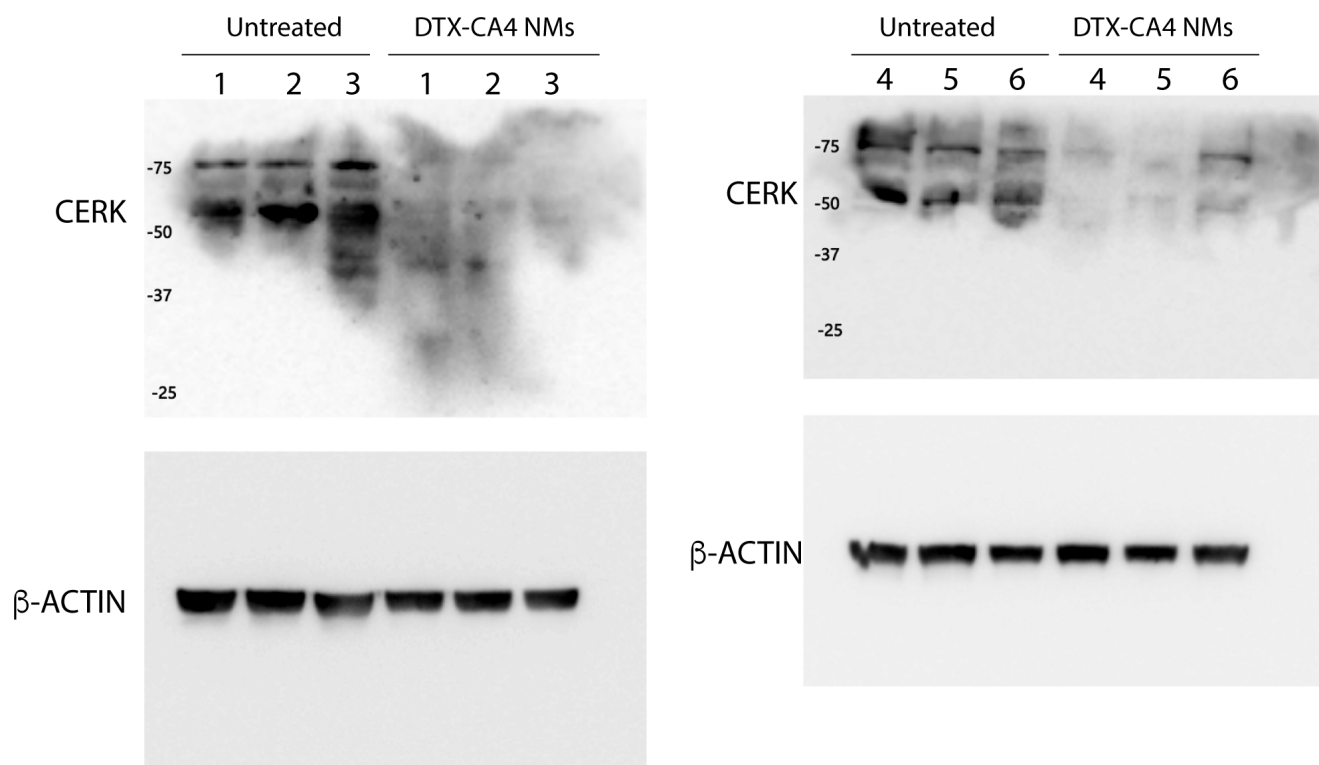

Figure S3. Original immunoblots.

# <sup>1</sup>H NMR of Compound 5

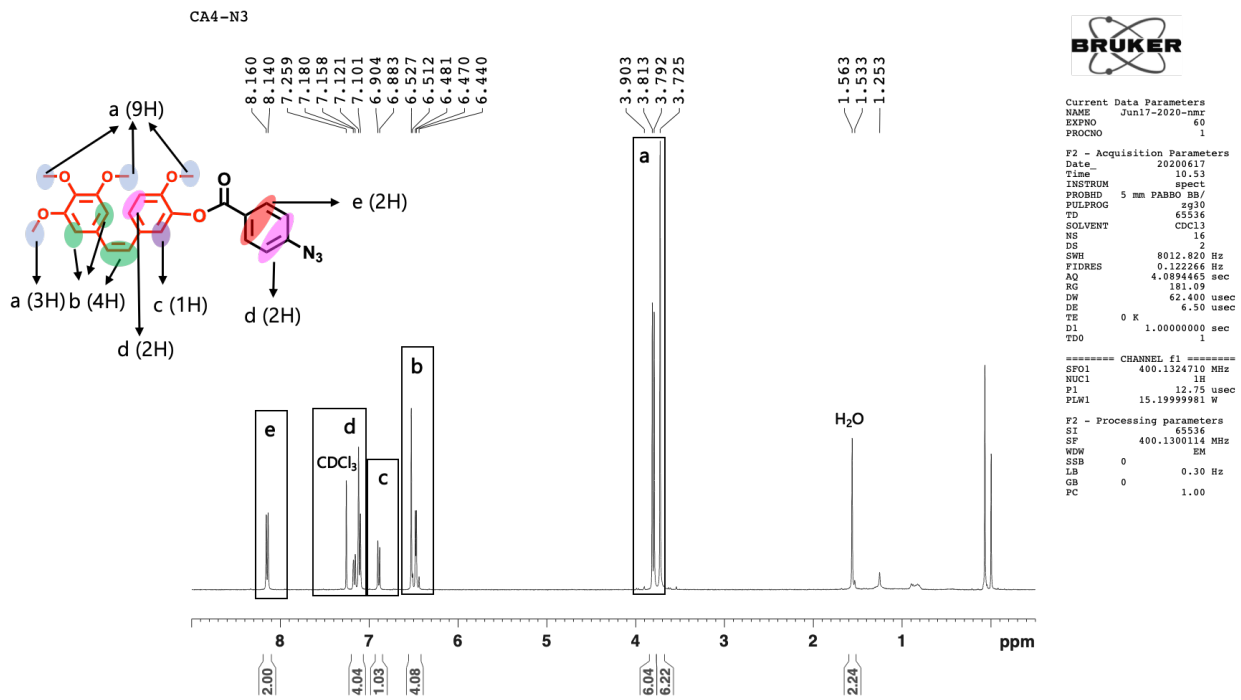

Figure S4. <sup>1</sup>H NMR of the compound 5 (CA4-Azide).

### <sup>13</sup>C NMR of Compound 5

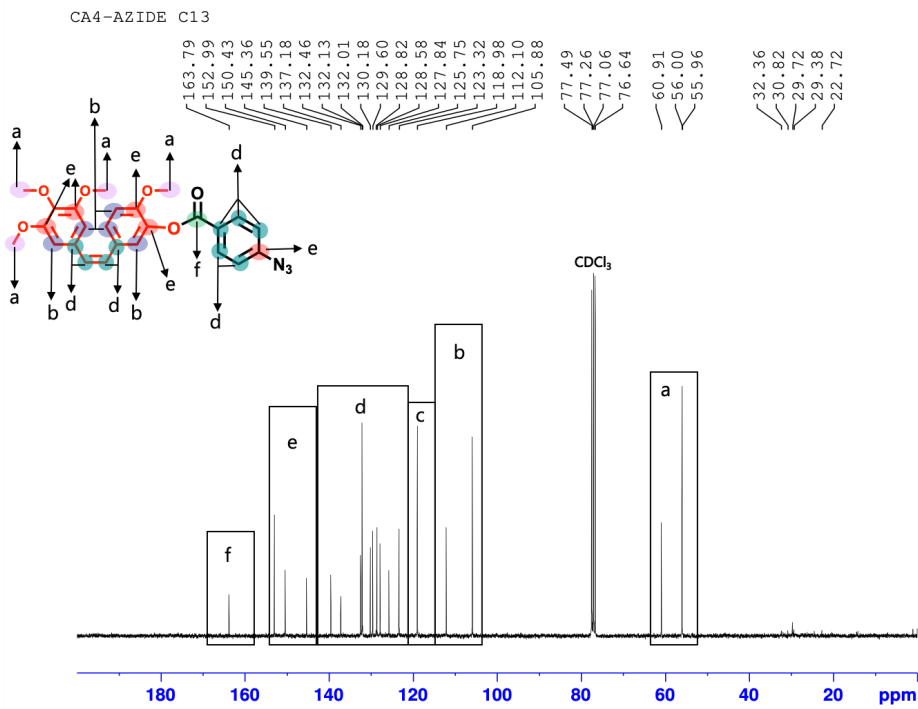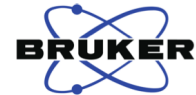

Current Data Parameters  
NAME Feb07-2024-THSTI  
EXPNO 90  
PROCNO 1

F2 - Acquisition Parameters  
Date\_ 20240207  
Time 19.10 h  
INSTRUM spect  
PROBHD Z104275\_0363 (  
PULPROG zgpg30  
TD 65536  
SOLVENT CDCl3  
NS 2000  
DS 4  
SWH 18115.941 Hz  
FIDRES 0.552855 Hz  
AQ 1.8087935 sec  
RG 12.92  
DW 27.600 usec  
DE 6.50 usec  
TE 296.2 K  
D1 2.00000000 sec  
D11 0.03000000 sec  
TD0 1  
SFO1 75.5180461 MHz  
NUC1 13C  
P1 10.00 usec  
PLW1 44.50699997 W  
SFO2 300.3012012 MHz  
NUC2 1H  
CPDPRG2 waltz16  
PCPD2 90.00 usec  
PLW2 8.38599968 W  
PLW12 0.20043489 W  
PLW13 0.10045800 W

F2 - Processing parameters  
SI 32768  
SF 75.5104951 MHz  
WDW EM  
SSB 0  
LB 1.00 Hz  
GB 0  
PC 1.40

Figure S5. <sup>13</sup>C NMR of the compound 5 (CA4-Azide).

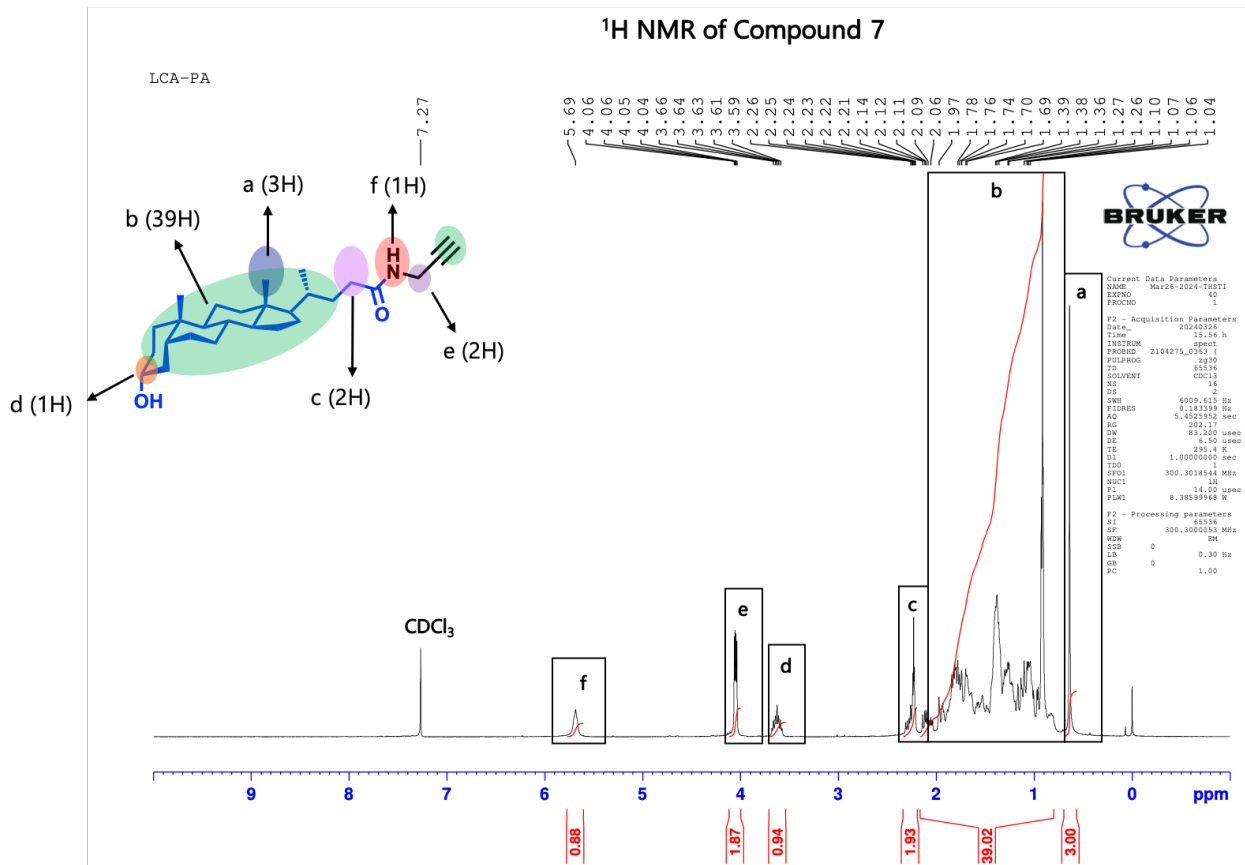

Figure S6. <sup>1</sup>H NMR of the compound 7 (LCA-PA).

# <sup>13</sup>C NMR of Compound 7

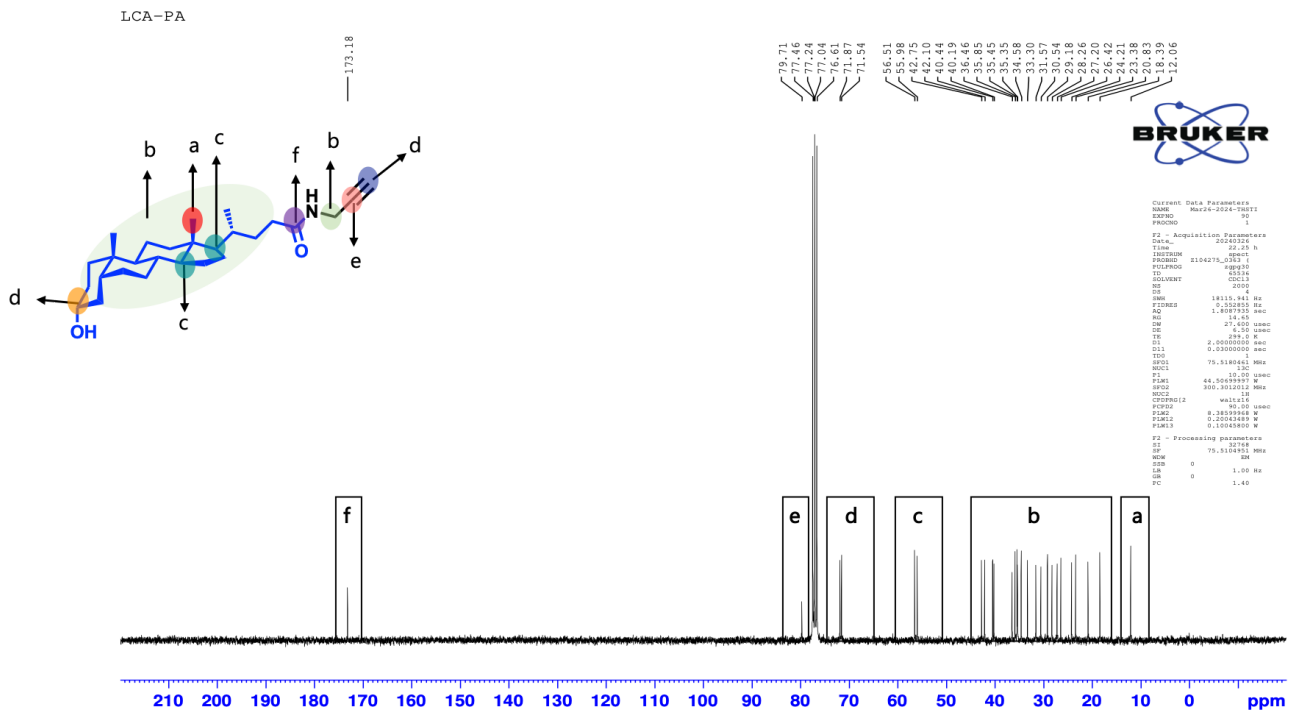

Figure S7. <sup>13</sup>C NMR of the compound 7 (LCA-PA).



# <sup>1</sup>H NMR of Compound 8

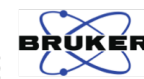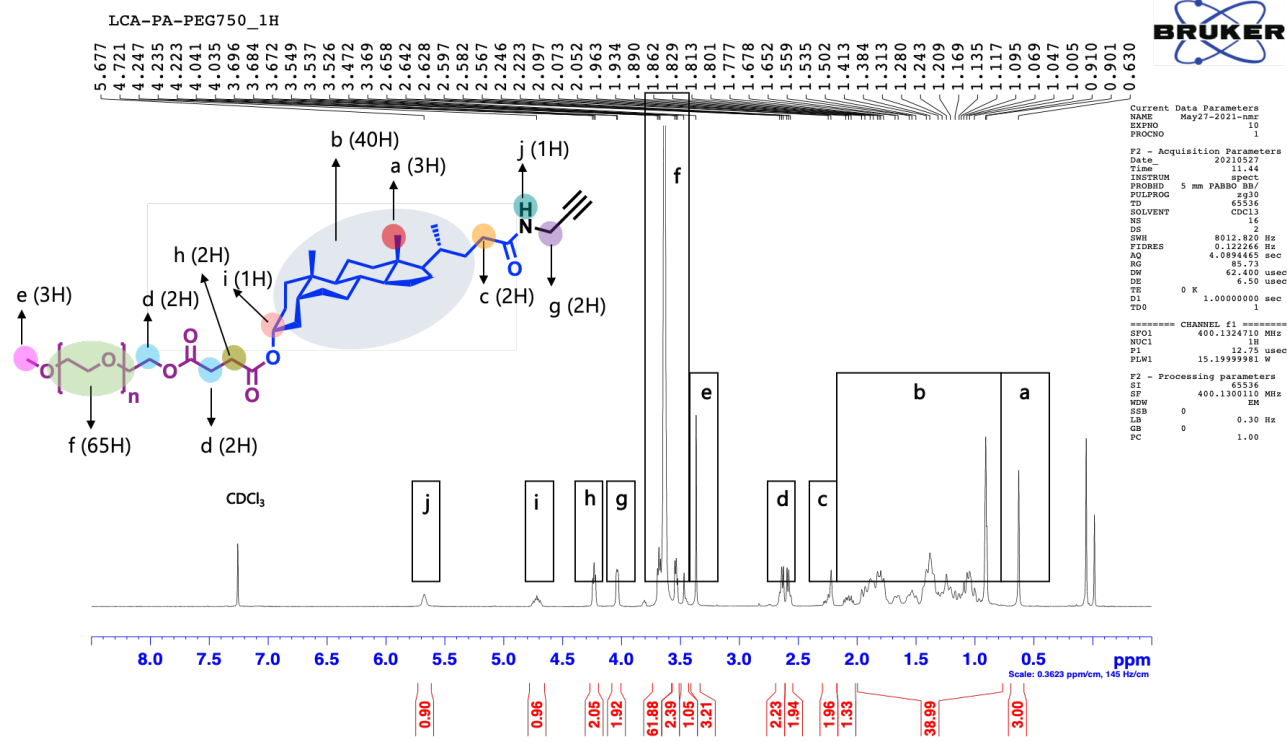

Figure S8. <sup>1</sup>H NMR of the compound 8 (PEG-LCA-PA).

# <sup>1</sup>H NMR of Compound 2

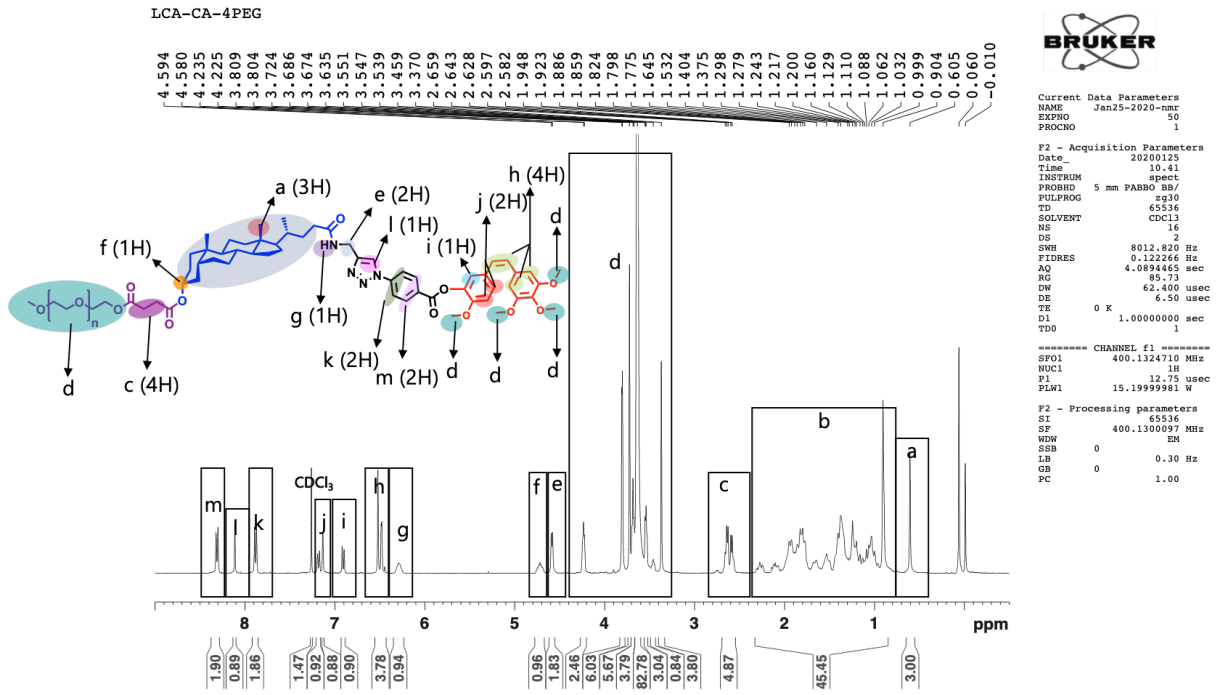

Figure S9. <sup>1</sup>H NMR of the compound 2 (PEG-LCA-CA4).

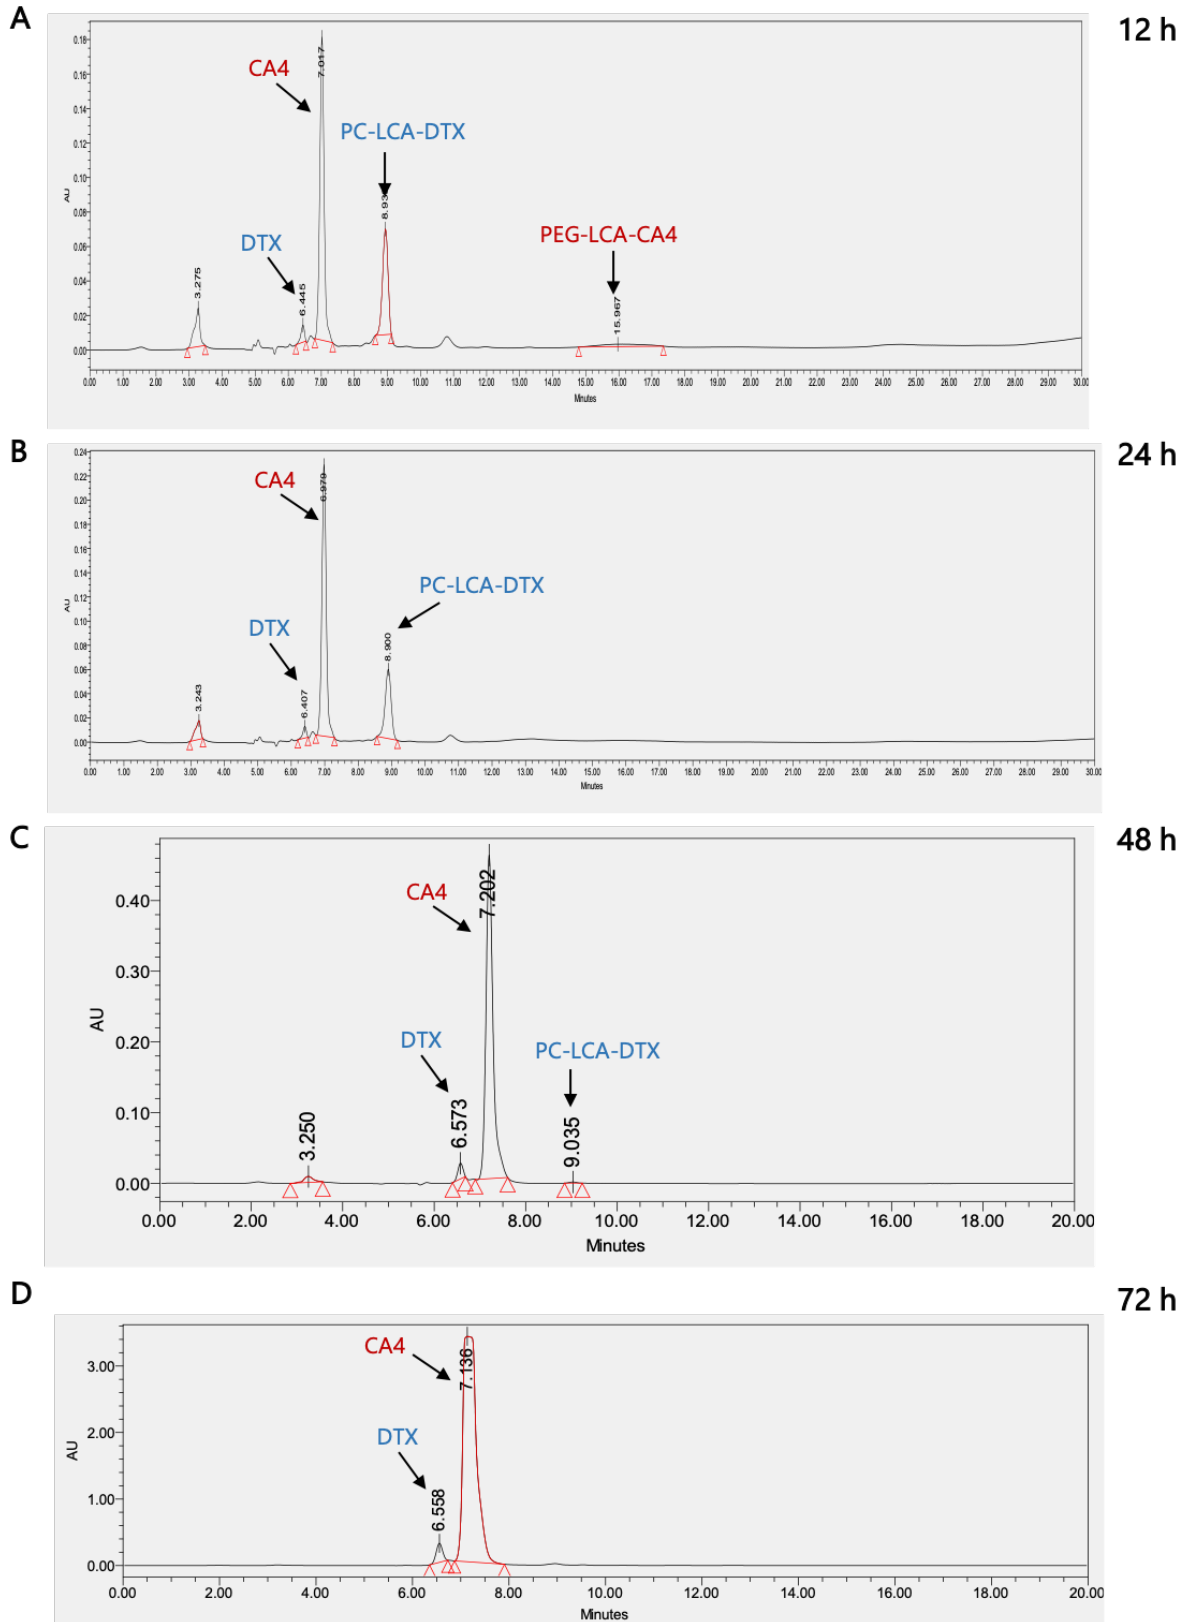

**Figure S10.** Representative HPLC chromatographs at different time points show the release of DTX and CA4 in the presence of esterase.
